1 **Fungal polysaccharopeptides reduce obesity by richness of specific microbiota**  
2 **and modulation of lipid metabolism**

3  
4 Xiaojun Li, Peng Chen, Peng Zhang, Yifan Chang, Mingxu Cui and Jinyou Duan

5  
6  
7 Shaanxi Key Laboratory of Natural Products & Chemical Biology, College of  
8 Chemistry & Pharmacy, Northwest A&F University, Yangling 712100, Shaanxi, China

9  
10  
11  
12  
13  
14 \* Correspondence:

15 Jinyou Duan, PhD

16 Tel.: +86 29-87092662;

17 E-mail: [jduan@nwsuaf.edu.cn](mailto:jduan@nwsuaf.edu.cn)

18  
19 Keywords: *Coriolus versicolor*; Protein-bound  $\beta$ -glucan; Obesity; Gut microbiota;

20 *Akkermansia muciniphila*; Lipid metabolism

21 **Abstract**

22 The prevalence of obesity and related disorders has vastly increased throughout the  
23 world and prevention of such circumstances thus represents a major challenge. Here,  
24 we show that protein-bound  $\beta$ -glucan (PBG), one representative of *Coriolus versicolor*  
25 polysaccharopeptides which are broadly used as immune boosters and clinically  
26 implicated in treatment of cancers and chronic hepatitis, could be a potent anti-obesity  
27 agent. PBG could reduce obesity and metabolic inflammation in mice fed with a  
28 high-fat diet (HFD). Gut microbiota analysis revealed that PBG markedly increased the  
29 abundance of *Akkermansia muciniphila* although it didn't rescue HFD-induced change  
30 in the *Firmicutes* to *Bacteroidetes* ratio. It appeared that PBG altered host physiology  
31 and created an intestinal microenvironment favorable for *A. muciniphila* colonization.  
32 Fecal transplants from PBG-treated animals in part reduced obesity in recipient  
33 HFD-fed mice. Further, PBG was shown to promote lipid metabolism in  
34 microbiota-depleted mice. Thus, our data highlights that PBG might exert its  
35 anti-obesity effects through a microbiota-dependent (richness of specific microbiota)  
36 and -independent (modulation of lipid metabolism) manner. The fact that *Coriolus*  
37 *versicolor* polysaccharopeptides are approved oral immune boosters in cancers and  
38 chronic hepatitis with well-established safety profiles may accelerate the development  
39 of PBG as a novel drug for obesity treatment.

## 40 **Introduction**

41 Obesity, an abnormal or excessive fat accumulation in adipose tissues, has become  
42 a major public health issue worldwide. Obesity is well-known as a contributing factor  
43 in diabetes, cardiovascular disease, hypertension, stroke, and cancer, etc (1). Given the  
44 serious health consequences of obesity as well as its economic burden, greater attention  
45 must be directed to the prevention, identification, and treatment of overweight and  
46 obese conditions (2).

47 Despite the fact that dieting and physical exercise is the main treatment modalities,  
48 persons with obesity failing lifestyle therapies need further aggressive intervention  
49 including pharmacotherapy, medical devices and bariatric surgery (3-5). Noninvasive  
50 anti-obesity drugs have resurfaced as adjunctive therapeutic approaches to bridge a gap  
51 between intensive lifestyle intervention and surgery (6).

52 Drug repurposing, also known as drug repositioning, is a strategy that seeks to  
53 reuse existing, licensed medications for new medical indications (7). It offers a variety  
54 of advantages when compared with *de novo* drug development. These include the  
55 availability of extensive pharmacokinetic, pharmacodynamic and safety data, and an  
56 understanding of relevant molecular targets and mechanisms of action, due to previous  
57 considerable clinical experience (8). Thus, drug repurposing can greatly slash  
58 development costs and quickly translate those existing medications into treatment of  
59 epidemic or devastating diseases (9).

60 Many cultures worldwide have long recognized that hot water decoctions from  
61 certain medicinal mushrooms such as *Ganoderma lucidum* and *Coriolus versicolor*

62 have health-promoting benefits (10). Thereinto, the polysaccharide fractions are  
63 believed as the major immunotherapeutic components, which are either  $\beta$ -glucans,  
64  $\beta$ -glucans with heterosaccharide chains or protein-bound  $\beta$ -glucans (PBGs), in other  
65 words, polysaccharopeptides (11-13). Numerous investigations *in vitro*, *in vivo* and  
66 clinical trials have reported that crude or purified PBGs from *C. versicolor* were  
67 adopted as an adjunct therapy for cancer (14) or chronic hepatitis (15). In this study,  
68 one purified PBG was repositioning as a potent anti-obesity agent and the in-depth  
69 understanding of this beneficial effect was examined.

## 70 **Results**

### 71 **PBG prevents HFD-induced obesity**

72 Oral administration of PBG daily at either a low dose (200 mg/kg, Group L) or a  
73 high dose (400 mg/kg, Group H) leads to a significant decrease of body weight in  
74 HFD-fed mice from 5 to 9 weeks (Fig.1a). The decreased weight gain (Fig.1b) and  
75 liver weight (Fig.1c) in PBG-treated mice at 9 weeks is not due to reduced food  
76 consumption (Fig.1d). PBG substantially prevents HFD-induced fat accumulation  
77 (Fig.1e), while it has no effect on lean mass (Fig.1f). Magnetic resonance imaging  
78 (MRI) reveals that PBG treatment apparently attenuates fat area in HFD-fed mice  
79 (Fig.1gh). Consistent with macroscopic evaluation of adiposity above, PBG feeding  
80 results in a dramatic reduction of triglyceride contents (Fig.1i), total bile acid (Fig.1j)  
81 and leptin (Fig.1k) in serum. There is an increase of plasma adiponectin (Fig.1l) and a  
82 decrease of hepatic lipid droplets (Fig.1mn) in HFD-fed mice after PBG treatment. It is  
83 noted that PBG daily at a dose of 200 mg/kg elicits an anti-obesity effect, comparable  
84 to simvastatin (2 mg/kg), a lipid-lowering medication on the World Health  
85 Organization's List of Essential Medicines while it is believed to be  
86 contraindicated with pregnancy, breast feeding, and liver disease (16).

### 87 **PBG reduces obesity-related metabolic inflammation**

88 Obesity is always associated with a low-grade chronic inflammation (17).  
89 HFD-fed mice produce higher levels of pro-inflammatory cytokines including tumors  
90 necrosis factor-alpha (TNF- $\alpha$ ), interleukin-1-beta (IL-1 $\beta$ ), interleukin-17A (IL-17A)  
91 and interleukin-6 (IL-6) in serum than chow-fed mice do (Fig.2a-d), indicating the

92 systemic inflammation is induced by HFD feeding. Administration of PBG or  
93 simvastatin suppresses the overproduction of those pro-inflammatory cytokines above  
94 in HFD-fed mice.

95 The obesity-related inflammation is characterized with an elevated level of gut  
96 microbiota-derived lipopolysaccharide (LPS) in circulation, an event defined as  
97 metabolic endotoxemia (18). PBG or simvastatin significantly reduces serum LPS  
98 levels in HFD-fed mice (Fig.2e), and increases expression of the tight junction  
99 components, zonula occludens-1 (ZO-1) (Fig.2f) and occludin-1 (Fig.2g). It seems that  
100 PBG can upregulate the transcription of ZO-1 and occluding-1 in microbiota-depleted  
101 mice, suggesting PBG directly protects HFD-induced disruption of tight junction  
102 regardless of gut microbiota (Fig.2h). The findings above are consistent with the  
103 concept that the increased expression of intestinal tight junction proteins improves  
104 intestinal barrier integrity and thus decreases leakage of microbial LPS from gut into  
105 circulation (17).

#### 106 **PBG beneficially alters obese-type gut microbiota**

107 It is generally accepted that changes in the composition of gut microbiota are  
108 associated with the development of obesity (19). To assess whether gut microbiota is  
109 involved in the anti-obesity effects of PBG, we performed a pyrosequencing-based  
110 assay of bacterial 16S rRNA (V3-V4 region) in fecal samples from different groups of  
111 mice (11-13 mice/group). After removing unqualified sequences (see Methods), a total  
112 of 4,799,464 raw reads and an average of  $67,738 \pm 3,949$  reads per sample were  
113 obtained. After selecting the effective reads, a total of 3,244,442 effective reads was

114 generated and each fecal sample produced an average of 54,074±4,309 effective reads.  
115 Samples with a low number of effective reads (<1622) were not observed. High-quality  
116 reads were clustered into Operational Taxonomic Units (OTUs).

117 Principal coordinates analysis (PCoA) of unweighted UniFrac distances of fecal  
118 microbiota was plotted, based on OTU abundances (Fig. 3a). The PCoA scores clearly  
119 display a distinct clustering of microbiota composition for each treatment group.  
120 Simvastatin treatment induces a mild shift of gut microbiota in HFD-fed mice, while  
121 intake of PBG leads to a more pronounced change in microbiota composition. The  
122 UPGMA (unweighted pair-group method with arithmetic means) tree also indicates  
123 there is a remarkable separation between the microbiota from most mice for each  
124 treatment (Fig. 3b).

125 Analysis of bacterial relative abundance confirmed prior reports that gut microbial  
126 communities of mice are dominated by bacteria from the *Firmicutes* and *Bacteroidetes*  
127 phyla (Fig. 3b) and that HFD feeding increases the proportion of *Firmicutes* versus  
128 *Bacteroidetes* (20). It appear that either PBG or simvastatin treatment doesn't rescue  
129 HFD-induced change in the *Firmicutes* to *Bacteroidetes* ratio (Fig. 3c). The most  
130 striking difference in gut microbiota between HFD-fed mice and PBG-treated mice lies  
131 in the abundance of the phylum *Verrucomicrobia* (Fig. 3c).

132 We used Wilcoxon signed-rank test to identify the specific bacterial genera that  
133 were altered by HFD feeding and PBG treatment (Fig. 3d). Compared with chow-fed  
134 mice, HFD feeding significantly altered 420 OTUs, producing 249 increased and 171  
135 decreased OTUs. In HFD-fed mice, simvastatin treatment altered 36 OTUs (13

136 increased and 23 decreased), while PGB daily at a dose of 400 mg/kg altered 140  
137 OTUs (29 increased and 111 decreased). Detailed analysis of the Top 100 OTUs  
138 indicated that the following 4 genera, *Akkermansia*, *Bacteroides*, *Bacterium*, and  
139 *Ruminiclostridium\_10* were profoundly increased in PGB-treated HFD-fed mice. The  
140 most striking one was *Akkermansia*, which was identified as the sole genus in the  
141 phylum *Verrucomicrobia*. PGB increased the percentage of *Akkermansia* from  $5.67 \pm$   
142  $1.5\%$  to  $22.1 \pm 2.3\%$  ( $p < 0.0001$ ) at a daily dose of 400 mg/kg.

143 **PBG promotes *Akkermansia muciniphila* colonization through altered host**  
144 **physiology**

145 It remains to be determined whether the interaction between PGB and the gut  
146 microbiota, *Akkermansia* is direct or indirect (i.e., mediated through promoting  
147 bacterial growth or altering host physiology). The *in vitro* analysis indicated that PGB  
148 couldn't directly promote the growth of *A. muciniphila* in the pure culture (Fig.4a). To  
149 see whether PGB affected the growth of *A. muciniphila* in a complex microbiota, we  
150 cultured fecal samples supplemented with *A. muciniphila* in two separate  
151 gut-simulators, and exposed them to a constant flow of PGB (40 mg/mL) for 42 h. No  
152 substantial difference in the abundance of *A. muciniphila* was observed following PGB  
153 exposure (Fig.4b).

154 To address whether PGB could alter host physiology and thus facilitate *A.*  
155 *muciniphila* colonization, we treated mice with an antibiotic cocktail for one month to  
156 deplete gut microbiota. The microbiota-depleted mice were further treated daily with  
157 PGB or PBS, along with the antibiotic cocktail to prevent recurrence of microbiota for



158 another month. The mice were lavaged with *A. muciniphila* ( $2 \times 10^8$  cfu / 0.2ml)  
159 continuously for 3 days and its abundance in the fecal samples was determined 24 h  
160 after each lavage. The amount of *A. muciniphila* was statically different at day 3 in  
161 feces between PBG-treated mice and control mice (Fig.4c). This observation suggested  
162 that PBG created an intestinal microenvironment favorable for *A. muciniphila*  
163 colonization.

164 *A. muciniphila* degrades intestinal mucins, the highly glycosylated proteins of the  
165 epithelial mucus layer, as its preferred source of carbon and nitrogen (21). Alterations  
166 of the mucus could be caused either by modification of gene expression that encode for  
167 the mucins (MUC genes) and/or of genes encoding for glycosyltransferases (GT genes)  
168 (22-24). We did not observe significant differences in gene expression of mucin 2  
169 protein (encode by MUC2 gene) and its related glycosyltransferases (C1galt1 and  
170 C2gnt genes) in colon tissues from PBG-treated mice and control mice (Fig.4d),  
171 suggesting that *A. muciniphila* is not simply responding to increased host mucin  
172 production.

### 173 **Fecal microbiota transplantation from PBG-treated mice reduces obesity**

174 It is well-known that alteration of gut microbiota by the transfer of foreign fecal  
175 materials could modulate obesity (25). We daily transferred fecal microbiota from the  
176 donor mice including chow-fed one, PBG treated chow-fed one, PBG treated HFD-fed  
177 one and HFD-fed one to the recipient HFD-fed mice. After 8 weeks, obesity-related  
178 syndromes were examined. The fecal transfer from the donor mice fed with chow  
179 (Chow→HFD), chow and PBG [PBG(Chow)→HFD], or HFD and PBG [PBG

180 (HFD)→HFD] reduced body weight, plasma leptin and total bile acid and increased  
181 plasma adiponectin, compared with that from HFD-fed mice (HFD→HFD) (Fig. 5a–c).  
182 Correspondingly, the obesity-related metabolic inflammation, as indicated by elevated  
183 serum levels of proinflammatory cytokines such as IL-6, IL-1 $\beta$  and TNF- $\alpha$  in the  
184 recipient mice was also diminished after the first three fecal microbiota transplantation  
185 above (Fig. 5d–f). These results suggest that the anti-obesity effects of PBG in  
186 HFD-fed mice might be due to modulation of the gut microbiota.

### 187 **PBG directly upregulates a set of gene expression involved in host metabolism**

188 To find out whether PBG has a direct impact on host metabolism, we performed  
189 transcriptomic analysis of colon tissues from microbiota-depleted mice treated with or  
190 without PBG. After quality control, a total of 130,093,406 clean reads and 38.78 Gb  
191 clean bases were obtained. The percentage of Q30 bases in each sample was not less  
192 than 90.94%. A total of 22,419 UniGenes were identified. To facilitate the functional  
193 analysis of these RNAs, the differential expressed mRNA genes were picked from the  
194 whole gene matrix with Cuffdiff (26) according to the two standards:  $|\log_2(\text{Fold}$   
195  $\text{Change})| \geq 1$  and adjusted  $p$ -value  $< 0.05$ . Compared with the control group, the PBG  
196 group had 155 differential expressed genes (DEGs) (Fig. 6a). Among 155 DEGs, 120  
197 were successfully annotated by Gene Ontology (GO) assignments and classified into  
198 three functional categories, which were molecular function, biological process, and  
199 cellular component. There were less DEGs classified into cellular component than the  
200 other two categories (Fig. 6b).

201 Within 155 DEGs, KEGG (Kyoto Encyclopedia of Genes and Genomes) database

202 analysis revealed 24 DEGs were relevant to metabolic pathways. The pathways related  
203 to lipid metabolism were mostly enriched, including fat digestion and absorption,  
204 glycosphinglipid biosynthesis, linoleic acid metabolism and bile secretion (Fig. 6c).  
205 These included a set of DEGs such as B3gnt5, Abcg8, Gyk, St8sia5, Pla2g2f, Aqp8,  
206 Abcg5, Pla2g4f, Fut9, Adh1, and Cyp2c68 which were highly upregulated in colon  
207 tissues from PBG-treated mice (Table S1). These findings indicated that PBG could  
208 promote host lipid metabolism, regardless of gut microbiota.

## 209 Discussion

210 The polysaccharopeptides produced by *C. versicolor* are effective  
211 immunopotentiators, supplementing the chemotherapy and radiotherapy of caners and  
212 infectious diseases. Several kinds of polysaccharopeptides have been shown to be  
213 produced by cultured mycelia or fruiting bodies. Although some of these polymers are  
214 structurally distinct, they are not distinguishable in terms of physiological activities  
215 (27).

216 PBG, one representative of polysaccharopeptides from the fruiting bodies of *C.*  
217 *versicolor*, indeed upregulates expression of genes related to host immune response in  
218 colon tissues (Table S1). The most pronounced one is CTSE gene, which encodes  
219 cathepsin E, an aspartic endopeptidase involved in antigen processing via the MHC  
220 class II pathway (28). Besides, several sets of genes related to elements of Toll-like or  
221 NOD-like signaling pathway and the complement system are upregulated (Table S1).  
222 These data suggest that PBG can activate innate and adaptive immunity in the intestine.  
223 Paradoxically, PBG suppresses systemic metabolic inflammation in HFD-fed obese  
224 animal models (Fig.2). Further evidences showed that this was due to PBG's ability to  
225 improve intestinal barrier integrity and thus decrease leakage of microbial LPS from  
226 gut into circulation.

227 The modulation of the gut microbiotic composition offers a new avenue for the  
228 treatment of obesity and metabolic disorders (18). PBG is identified for the first time as  
229 an anti-obesity agent. The transfer of feces from PBG-treated mice protected the  
230 recipient HFD-fed mice from obesity, suggesting a vital role of gut microbiota in

231 PBG's anti-obesity effect. Unlike other established prebiotics such as dietary  
232 polyphenols (29), inulin (30), and oat-derived  $\beta$ -glucan (31), PBG didn't restore  
233 HFD-induced increase in the *Firmicutes* to *Bacteroidetes* ratio. PBG markedly  
234 increased the abundance of *A. muciniphila*, a mucin-degrading bacterium that could  
235 reverse HFD-induced obesity (32). PBG didn't boost the growth of *A. muciniphila*,  
236 either in pure cultures or gut-simulators. By use of a cocktail of antibiotics,  
237 microbiota-depleted mice were generated. Data from microbiota-depleted mice  
238 indicated that PBG created an intestinal microenvironment favorable for *A.*  
239 *muciniphila* colonization. The genome of *A. muciniphila* contains a large proportion of  
240 genes encoding secreted proteins (567 of the 2,176 open reading frames), 61 of which  
241 have been assigned protease, sugar hydrolase, sialidase, or sulfatase activities,  
242 suggesting specialization in mucus utilization and adaptation to the gut environment  
243 (33). Given recent evidence indicated that *A. muciniphila* colonization was mediated  
244 by host immune status (34, 35), it will be intriguing to clarify the relationship between  
245 richness of *A. muciniphila* and PBG-induced immunomodulation in the future.

246 Transcriptome analysis of PBG-induced differentially expressed genes in colon  
247 tissues indicated that PBG had a direct pronounced effect on host lipid metabolism.  
248 These finding implied that PBG might reduce fat accumulation through a  
249 microbiota-dependent or -independent manner.

250 In summary, we demonstrated that PBG, one representative of *C. versicolor*  
251 polysaccharopeptide originally used as an adjunct therapy for cancers could be an  
252 anti-obesity agent through modulating gut microbiota and regulating host metabolism.

253 Overweight and obesity are associated with at least 13 different types of cancer. These  
254 cancers make up 40% of all cancers diagnosed (36, 37). A variety of biological  
255 mechanisms involving the adipocyte has been implicated in tumorigenesis. The  
256 previous consensus on the anti-cancer effect and the current knowledge in the  
257 anti-obesity effect of *C. versicolor* polysaccharopeptides might make them favorable to  
258 those patients suffered from obesity-associated cancers.  
259

## 260 **Methods**

### 261 **Murine**

262 C57BL/6J female mice were purchased from the Fourth Military Medical  
263 University (Xi'an, Shaanxi, China). After one week for accommodation, mice were  
264 randomly distributed into different groups, fed with either a standard chow diet (10  
265 kcal % Fat, D12492) or a high-fat diet (60 kcal % Fat, D12450J). Animal procedures  
266 were approved by the Animal Ethics Committee in Northwest A & F University, China.

### 267 **Preparation of protein-bound $\beta$ -glucan**

268 The *Coriolus versicolor* powder was subjected to hot water extraction and alcohol  
269 precipitation. The resulting precipitates were dissolved in water and dialyzed (cutting  
270 MW at 8000 Da). The non-dialysates were concentrated and the supernatant was  
271 applied to a DEAE-Fast-Flow column (10 i.d.  $\times$  60 cm) with stepwise distilled H<sub>2</sub>O  
272 and 0.5 M NaCl solution. The 0.5 M NaCl eluent, designated as PBG was dialyzed and  
273 lyophilized. The structural information was shown in Table S2.

### 274 **Body composition analysis**

275 Body composition was measured with the nuclear magnetic resonance system  
276 using a Body Composition Analyzer MiniQMR23-060H-I (Niumag, Shanghai, China).  
277 Body fat and lean mass were determined in live conscious mice with ad libitum access  
278 to chow as previously described (38).

### 279 **H&E Staining**

280 Liver was fixed in 10% buffered formalin at room temperature before embedding  
281 in paraffin. Histological assessment of H&E sections was performed in a blinded  
282 fashion by a pathologist using a previously described scoring system (39).

### 283 **Cytokine measurements**

284 IL-1 $\beta$ , IL-6, IL-10 and TNF- $\alpha$  protein levels in serum were measured using

285 commercial Bio-Plex Pro mouse kits (BIO-RAD, USA).

## 286 **Biochemical analysis**

287 Serum leptin, adiponectin, and LPS were measured by quantification assay kits  
288 (Cusabio, China). Triglyceride and total BA were assayed using commercial detection  
289 kits (Nanjing Jiancheng Chemical Industrial Co. Ltd, China).

## 290 **Real-Time PCR**

291 Samples of total RNA from colon tissue was isolated using the TRIZOL solution  
292 (TransGen, Beijing, China). Quantitative real-time reverse-transcription PCR  
293 (qRT-PCR) was performed in triplicate on a QuantStudio™ 6 Flex Real-Time PCR  
294 (Life Technologies, Singapore). The primers used are shown in Table S3 (40, 41).

## 295 **Gut microbiota analysis**

296 Stool samples were snap-frozen in liquid nitrogen before storage at -80°C. Total  
297 bacterial DNA was extracted using a fecal DNA isolation kit (MoBio Laboratories,  
298 USA) according to the manufacturer's protocol. The 16S rRNA gene comprising  
299 V3–V4 regions was amplified using common primer pair and the microbial diversity  
300 analysis was performed as described (42).

301 Briefly, the raw sequences were first quality-controlled using QIIME with default  
302 parameters, then demultiplexed and clustered into species-level (97% similarity)  
303 operational taxonomic units (OTUs). OUT generation is based on GreenGene's  
304 database and the reference-based method with SortMeRNA. Strain composition  
305 analysis, alpha diversity analysis and beta diversity analysis were also performed using  
306 QIIME. Discriminative taxa were determined using LEfSe (LDA Effect Size,  
307 <http://huttenhower.sph.harvard.edu/galaxy/>).

## 308 ***In vitro* gut simulator**

309 A three compartment dynamic *in vitro* human intestinal tract model (SHIME) was



310 used to study the effects of PBG on a stabilized gut microbial community in a  
311 controlled *in vitro* setting (43).

### 312 ***A. muciniphila* colonization**

313 C57Bl/6J female mice ( 4 weeks old) were fed with HFD and treated with an  
314 antibiotic cocktail for 4 weeks as described (44). The microbiota-depleted mice were  
315 daily supplemented with or without PBG (400 mg/kg) for another month in the  
316 presence of antibiotics. Mice were lavaged with *A. muciniphila* ( $1.5 \times 10^8$  cfu)  
317 continuously for 3 days as previously described (32). Fecal samples were collected 24  
318 h after each lavage and *Akkermansia muciniphila* in the feces was quantified by qPCR  
319 using the universal 16S rRNA gene primers (shown in Table S3).

### 320 **Fecal transplantation**

321 Fecal transplantation was performed according to a previous study (45). The  
322 donor mice (4-week-old, n=10 per group) were fed with Chow, (PBG+Chow),  
323 (PBG+HFD), or HFD for 4 weeks. Stools from donor mice of each diet group were  
324 subsequently collected and pooled. The transplant material was prepared as  
325 resuspension of 100 mg of stools from each diet group in 1 ml of sterile saline, and  
326 centrifugation at 800g for 3 min to obtain the supernatant. The recipient mice  
327 (8-week-old, n=6-8 per transplant group) were fed with HFD and orally treated with  
328 200 $\mu$ l of fresh transplant material daily, which was prepared on the same day within 10  
329 min of transplantation. After 8 weeks of treatment, the recipient mice were killed for  
330 subsequent analysis.

### 331 **Transcriptomic analysis**

332 HFD-fed mice were treated daily with a cocktail of antibiotics for one month,  
333 followed by supplementation with or without PBG (400 mg/kg) for another month in  
334 the presence of antibiotics (46). RNA extracted from colon tissues was performed via a

335 paired-end 125 cycle rapid run on the Illumina HiSeq. 2500. The clean reads that were  
336 filtered from the raw reads were mapped to mouse (C57BL/6 strain) reference genome  
337 (GRCm38) using Tophat2 (47) software. FPKM values were used to estimate gene  
338 expression by use of the Cufflinks software (26). The DESeq (48), Kyoto  
339 Encyclopaedia of Genes and Genomes (KEGG), and gene ontology (GO) terms were  
340 determined via protein database by BLASTX (49).

### 341 **Statistical analysis**

342 All data of experiment were shown as means $\pm$  standard error of mean (S.E.M.)  
343 Data sets that involved more than two groups were assessed by one-way ANOVA  
344 followed by Dunnett's multiple comparisons test and unpaired two-tailed Student's  
345 t-test. 16S rRNA gene sequence analysis was assessed using Paired Wilcoxon  
346 rank-sum test. A  $p$  value of 0.05 was considered statistically significant based on  
347 ANOVA statistical analysis by Graphpad 7.0 and the R programming language. Data  
348 of RNA-Sequence are presented as mean FPKM  $\pm$  S.E.M.. Differences between PBG  
349 and Blank mice that were evaluated FDR ( $p < 0.05$ ) by using Benjamini-Hochberg  
350 method.

### 351 **Acknowledgement**

352 This work was supported by the National Natural Science Foundation of China  
353 (NSFC) (31570799), and Fundamental Research Funds for the Central Universities,  
354 Northwest A&F University (2452017026).

### 355 **Competing interests**

356 The authors declare that they have no conflict of interest.

## 357 **References**

- 358 1. **Kopelman PG.** 2000. Obesity as a medical problem. *Nature* **404**:635.
- 359 2. **Dietz WH, Baur LA, Hall K, Puhl RM, Taveras EM, Uauy R, Kopelman P.** 2015. Management of  
360 obesity: improvement of health-care training and systems for prevention and care. *Lancet*  
361 **385**:2521-2533.
- 362 3. **Ryder JR, Fox CK, Kelly AS.** 2018. Treatment Options for Severe Obesity in the Pediatric Population:  
363 Current Limitations and Future Opportunities. *Obesity* **26**:951-960.
- 364 4. **Apovian CM, Garvey WT, Ryan DH.** 2015. Challenging obesity: Patient, provider, and expert  
365 perspectives on the roles of available and emerging nonsurgical therapies. *Obesity* **23 Suppl**  
366 **2**:S1-S26.
- 367 5. **Patel D.** 2015. Pharmacotherapy for the management of obesity. *Metabolism: clinical and*  
368 *experimental* **64**:1376-1385.
- 369 6. **Srivastava G, Apovian CM.** 2018. Current pharmacotherapy for obesity. *Nature reviews.*  
370 *Endocrinology* **14**:12-24.
- 371 7. **Novac N.** 2013. Challenges and opportunities of drug repositioning. *Trends in pharmacological*  
372 *sciences* **34**:267-272.
- 373 8. **Sleire L, Forde HE, Netland IA, Leiss L, Skeie BS, Enger PO.** 2017. Drug repurposing in cancer.  
374 *Pharmacological research* **124**:74-91.
- 375 9. **Wurth R, Thellung S, Bajetto A, Mazzanti M, Florio T, Barbieri F.** 2016. Drug-repositioning  
376 opportunities for cancer therapy: novel molecular targets for known compounds. *Drug discovery*  
377 *today* **21**:190-199.
- 378 10. **Smith JE, Rowan NJ, Sullivan R.** 2002. Medicinal mushrooms: a rapidly developing area of  
379 biotechnology for cancer therapy and other bioactivities. *Biotechnol Lett* **24**:1839-1845.
- 380 11. **Yu Y, Shen M, Song Q, Xie J.** 2018. Biological activities and pharmaceutical applications of  
381 polysaccharide from natural resources: A review. *Carbohydrate polymers* **183**:91-101.
- 382 12. **Schepetkin IA, Quinn MT.** 2006. Botanical polysaccharides: macrophage immunomodulation and  
383 therapeutic potential. *International immunopharmacology* **6**:317-333.
- 384 13. **Singdevsachan SK, Auroshree P, Mishra J, Baliyarsingh B, Tayung K, Thatoi H.** 2016. Mushroom  
385 polysaccharides as potential prebiotics with their antitumor and immunomodulating properties: A  
386 review. *Bioact Carbohydr Diet Fibre* **7**:1-14.
- 387 14. **Saleh MH, Rashedi I, Keating A.** 2017. Immunomodulatory Properties of *Coriolus versicolor*: The  
388 Role of Polysaccharopeptide. *Frontiers in immunology* **8**:1087.
- 389 15. **Ren Y, Geng Y, Chen H, Lu Z-M, Shi J-S, Xu Z.** 2018. Polysaccharide peptides from *Coriolus*  
390 *versicolor*: A multi-targeted approach for the protection or prevention of alcoholic liver disease. *J*  
391 *Funct Foods* **40**:769-777.
- 392 16. **Armitage J.** 2007. The safety of statins in clinical practice. *Lancet* **370**:1781-1790.
- 393 17. **Stephens RW, Arhire L, Covasa M.** 2018. Gut Microbiota: From Microorganisms to Metabolic Organ  
394 Influencing Obesity. *Obesity* **26**:801-809.
- 395 18. **Cani PD, Delzenne NM.** 2009. Interplay between obesity and associated metabolic disorders: new  
396 insights into the gut microbiota. *Curr Opin Pharmacol* **9**:737-743.
- 397 19. **Dao MC, Clement K.** 2018. Gut microbiota and obesity: Concepts relevant to clinical care. *European*  
398 *journal of internal medicine* **48**:18-24.
- 399 20. **Ley RE, Turnbaugh PJ, Klein S, Gordon JI.** 2006. Microbial ecology: human gut microbes associated  
400 with obesity. *Nature* **444**:1022-1023.

- 401 21. **Derrien M, Belzer C, de Vos WM.** 2017. Akkermansia muciniphila and its role in regulating host  
402 functions. Microbial pathogenesis **106**:171-181.
- 403 22. **Graziani F, Pujol A, Nicoletti C, Dou S, Maresca M, Giardina T, Fons M, Perrier J.** 2016.  
404 Ruminococcus gnavus E1 modulates mucin expression and intestinal glycosylation. Journal of  
405 applied microbiology **120**:1403-1417.
- 406 23. **Pinton P, Graziani F, Pujol A, Nicoletti C, Paris O, Ernouf P, Di Pasquale E, Perrier J, Oswald IP,**  
407 **Maresca M.** 2015. Deoxynivalenol inhibits the expression by goblet cells of intestinal mucins  
408 through a PKR and MAP kinase dependent repression of the resistin-like molecule beta. Molecular  
409 nutrition & food research **59**:1076-1087.
- 410 24. **Bergstrom KS, Xia L.** 2013. Mucin-type O-glycans and their roles in intestinal homeostasis.  
411 Glycobiology **23**:1026-1037.
- 412 25. **Tremaroli V, Bäckhed F.** 2012. Functional interactions between the gut microbiota and host  
413 metabolism. Nature **489**:242.
- 414 26. **Trapnell C, Williams BA, Pertea G, Mortazavi A, Kwan G, van Baren MJ, Salzberg SL, Wold BJ,**  
415 **Pachter L.** 2010. Transcript assembly and quantification by RNA-Seq reveals unannotated  
416 transcripts and isoform switching during cell differentiation. Nature biotechnology **28**:511-515.
- 417 27. **Cui J, Chisti Y.** 2003. Polysaccharopeptides of Coriolus versicolor: physiological activity, uses, and  
418 production. Biotechnology advances **21**:109-122.
- 419 28. **Zaidi N, Kalbacher H.** 2008. Cathepsin E: a mini review. Biochemical and biophysical research  
420 communications **367**:517-522.
- 421 29. **Roopchand DE, Carmody RN, Kuhn P, Moskal K, Rojas-Silva P, Turnbaugh PJ, Raskin I.** 2015.  
422 Dietary Polyphenols Promote Growth of the Gut Bacterium Akkermansia muciniphila and Attenuate  
423 High-Fat Diet-Induced Metabolic Syndrome. Diabetes **64**:2847-2858.
- 424 30. **Han KH, Yamamoto A, Shimada KI, Kikuchi H, Fukushima M.** 2017. Dietary fat content modulates  
425 the hypolipidemic effect of dietary inulin in rats. Molecular nutrition & food research **61**:1600635.
- 426 31. **Luo Y, Zhang L, Li H, Smidt H, Wright AG, Zhang K, Ding X, Zeng Q, Bai S, Wang J, Li J, Zheng P, Tian**  
427 **G, Cai J, Chen D.** 2017. Different Types of Dietary Fibers Trigger Specific Alterations in Composition  
428 and Predicted Functions of Colonic Bacterial Communities in BALB/c Mice. Frontiers in microbiology  
429 **8**:966.
- 430 32. **Everard A, Belzer C, Geurts L, Ouwerkerk JP, Druart C, Bindels LB, Guiot Y, Derrien M, Muccioli GG,**  
431 **Delzenne NM, de Vos WM, Cani PD.** 2013. Cross-talk between *Akkermansia muciniphila* and  
432 intestinal epithelium controls diet-induced obesity. Proc Natl Acad Sci USA **110**:9066-9071.
- 433 33. **van Passel MW, Kant R, Zoetendal EG, Plugge CM, Derrien M, Malfatti SA, Chain PS, Woyke T,**  
434 **Palva A, de Vos WM, Smidt H.** 2011. The genome of Akkermansia muciniphila, a dedicated  
435 intestinal mucin degrader, and its use in exploring intestinal metagenomes. PloS one **6**:e16876.
- 436 34. **Greer RL, Dong X, Moraes AC, Zielke RA, Fernandes GR, Peremyslova E, Vasquez-Perez S,**  
437 **Schoenborn AA, Gomes EP, Pereira AC, Ferreira SR, Yao M, Fuss IJ, Strober W, Sikora AE, Taylor**  
438 **GA, Gulati AS, Morgun A, Shulzhenko N.** 2016. Akkermansia muciniphila mediates negative effects  
439 of IFN $\gamma$  on glucose metabolism. Nature communications **7**:13329.
- 440 35. **Seregin SS, Golovchenko N, Schaf B, Chen J, Pudlo NA, Mitchell J, Baxter NT, Zhao L, Schloss PD,**  
441 **Martens EC, Eaton KA, Chen GY.** 2017. NLRP6 Protects Il10(-/-) Mice from Colitis by Limiting  
442 Colonization of Akkermansia muciniphila. Cell reports **19**:2174.
- 443 36. **Steele CB, Thomas CC, Henley SJ, Massetti GM, Galuska DA, Agurs-Collins T, Puckett M,**  
444 **Richardson LC.** 2017. Vital Signs: Trends in Incidence of Cancers Associated with Overweight and

- 445 Obesity - United States, 2005-2014. *MMWR. Morbidity and mortality weekly report* **66**:1052-1058.
- 446 37. **Pearson-Stuttard J, Zhou B, Kontis V, Bentham J, Gunter MJ, Ezzati M.** 2018. Worldwide burden of  
447 cancer attributable to diabetes and high body-mass index: a comparative risk assessment. *The*  
448 *lancet. Diabetes & endocrinology* **6**:e6-e15.
- 449 38. **Chen X, Zhang F, Gong Q, Cui A, Zhuo S, Hu Z, Han Y, Gao J, Sun Y, Liu Z, Yang Z, Le Y, Gao X, Dong**  
450 **LQ, Gao X, Li Y.** 2016. Hepatic ATF6 Increases Fatty Acid Oxidation to Attenuate Hepatic Steatosis in  
451 Mice Through Peroxisome Proliferator–Activated Receptor  $\alpha$ . *Diabetes* **65**:1904.
- 452 39. **Nakamura A, Tajima K, Zolzaya K, Sato K, Inoue R, Yoneda M, Fujita K, Nozaki Y, Kubota KC, Haga**  
453 **H, Kubota N, Nagashima Y, Nakajima A, Maeda S, Kadowaki T, Terauchi Y.** 2012. Protection from  
454 non-alcoholic steatohepatitis and liver tumorigenesis in high fat-fed insulin receptor  
455 substrate-1-knockout mice despite insulin resistance. *Diabetologia* **55**:3382-3391.
- 456 40. **Guo X, Zhang J, Wu F, Zhang M, Yi M, Peng Y.** 2016. Different subtype strains of *Akkermansia*  
457 *muciniphila* abundantly colonize in southern China. *Journal of applied microbiology* **120**:452-459.
- 458 41. **Wlodarska M, Luo C, Kolde R, d'Hennezel E, Annand JW, Heim CE, Krastel P, Schmitt EK, Omar AS,**  
459 **Creasey EA, Garner AL, Mohammadi S, O'Connell DJ, Abubucker S, Arthur TD, Franzosa EA,**  
460 **Huttenhower C, Murphy LO, Haiser HJ, Vlamakis H, Porter JA, Xavier RJ.** 2017. Indoleacrylic Acid  
461 Produced by Commensal *Peptostreptococcus* Species Suppresses Inflammation. *Cell host &*  
462 *microbe* **22**:25-37 e26.
- 463 42. **Qin J, Li Y, Cai Z, Li S, Zhu J, Zhang F, Liang S, Zhang W, Guan Y, Shen D, Peng Y, Zhang D, Jie Z, Wu**  
464 **W, Qin Y, Xue W, Li J, Han L, Lu D, Wu P, Dai Y, Sun X, Li Z, Tang A, Zhong S, Li X, Chen W, Xu R,**  
465 **Wang M, Feng Q, Gong M, Yu J, Zhang Y, Zhang M, Hansen T, Sanchez G, Raes J, Falony G, Okuda**  
466 **S, Almeida M, LeChatelier E, Renault P, Pons N, Batto JM, Zhang Z, Chen H, Yang R, Zheng W, Li S,**  
467 **Yang H, Wang J, Ehrlich SD, Nielsen R, Pedersen O, Kristiansen K, Wang J.** 2012. A  
468 metagenome-wide association study of gut microbiota in type 2 diabetes. *Nature* **490**:55-60.
- 469 43. **Wu H, Esteve E, Tremaroli V, Khan MT, Caesar R, Manneras-Holm L, Stahlman M, Olsson LM,**  
470 **Serino M, Planas-Felix M, Xifra G, Mercader JM, Torrents D, Burcelin R, Ricart W, Perkins R,**  
471 **Fernandez-Real JM, Backhed F.** 2017. Metformin alters the gut microbiome of individuals with  
472 treatment-naive type 2 diabetes, contributing to the therapeutic effects of the drug. *Nature*  
473 *medicine* **23**:850-858.
- 474 44. **Grivnennikov SI, Wang K, Mucida D, Stewart CA, Schnabl B, Jauch D, Taniguchi K, Yu GY,**  
475 **Osterreicher CH, Hung KE, Datz C, Feng Y, Fearon ER, Oukka M, Tessarollo L, Coppola V, Yarovinsky**  
476 **F, Cheroutre H, Eckmann L, Trinchieri G, Karin M.** 2012. Adenoma-linked barrier defects and  
477 microbial products drive IL-23/IL-17-mediated tumour growth. *Nature* **491**:254-258.
- 478 45. **Li G, Xie C, Lu S, Nichols RG, Tian Y, Li L, Patel D, Ma Y, Brocker CN, Yan T, Krausz KW, Xiang R,**  
479 **Gavrilova O, Patterson AD, Gonzalez FJ.** 2017. Intermittent Fasting Promotes White Adipose  
480 Browning and Decreases Obesity by Shaping the Gut Microbiota. *Cell metabolism* **26**:801.
- 481 46. **Fu ZD, Selwyn FP, Cui JY, Klaassen CD.** 2017. RNA-Seq Profiling of Intestinal Expression of  
482 Xenobiotic Processing Genes in Germ-Free Mice. *Drug metabolism and disposition: the biological*  
483 *fate of chemicals* **45**:1225-1238.
- 484 47. **Kim D, Pertea G, Trapnell C, Pimentel H, Kelley R, Salzberg SL.** 2013. TopHat2: accurate alignment  
485 of transcriptomes in the presence of insertions, deletions and gene fusions. *Genome biology*  
486 **14**:R36.
- 487 48. **Anders S, Huber W.** 2010. Differential expression analysis for sequence count data. *Genome*  
488 *biology* **11**:R106.

489 49. **Conesa A, Gotz S, Garcia-Gomez JM, Terol J, Talon M, Robles M.** 2005. Blast2GO: a universal tool  
490 for annotation, visualization and analysis in functional genomics research. *Bioinformatics*  
491 **21:3674-3676.**

492

493

494 **Figure legends**

495 **Fig.1. PBG treatment decreases body weight and fat accumulation in**

496 **HFD-induced obese mice.** HFD-fed mice were treated daily with either water (group

497 HFD), simvastatin at 2 mg/kg (Group P) or PBG at 200 (Group L) or 400 mg/kg

498 (Group H) by intragastric gavage for 9 weeks (n=11-13 for each group). As a control,

499 Chow-fed mice (Group Chow) were lavaged with water daily. (a) body weight curves;

500 (b) body weight gain; (c) liver weight; (d) food consumption; (e) fat mass; (f) lean

501 mass; (g) a representative of magnetic resonance imaging (MRI); (h) fat area by MRI;

502 (i) serum triglyceride; (j) total bile acid in serum; (k) serum leptin; (l) serum

503 adiponectin; (m) a representative of liver sections in which lipid content was assessed

504 using H&E staining; (h) normalized fold change of liver lipid content. Data are shown

505 as mean±s.e.m. *p* value in (a) and (l) were analysed using unpaired two-tailed

506 Student's *t*-test. *p* value in (b)-(k) and (n) were analysed using Dunnett's multiple

507 comparisons test. \**p* < 0.05, \*\**p* < 0.01, \*\*\**p* < 0.001 and \*\*\*\**p* < 0.0001.

508 **Fig.2. PBG treatment reduces serum pro-inflammation cytokines and**

509 **lipopolysaccharide through improvement of intestinal barrier integrity in obese**

510 **mice.** Mice were treated as Figure 1. Effects of PBG treatment on serum TNF- $\alpha$ , IL-1 $\beta$ ,

511 IL-17A, IL-6 and endotoxin (a-e) were examined by ELISA kits, and on relative

512 mRNA expression of ZO-1(f) and occludin (g) in colon were assessed using qRT-PCR;

513 (h) relative mRNA expression of ZO-1 and occludin from colons of microbiota-depleted

514 mice treated with or without PBG. *p* value in (a-e) were analysed using Dunnett's

515 multiple comparisons test. *p* value in (f-h) were analyzed using unpaired two-tailed



516 Student's t-test. \* $p < 0.05$ , \*\* $p < 0.01$ , \*\*\* $p < 0.001$ , \*\*\*\* $p < 0.0001$ .

517 **Fig.3. PBG treatment affects microbiota in HFD-induced obese mice.**

518 Microbiota composition were analyzed using a pyrosequencing-based assay on feces of  
519 chow- and HFD-fed mice (n=11-13 for each group) as described in Figure 1. (a) Plots  
520 were generated using the unweighted version of the UniFrac-based PcoA; (b) Bacterial  
521 taxonomic profiling in the phylum level of microbiota from individual groups; (c)  
522 Comparison of *Firmicutes* to *Bacteroidetes* ratio and relative abundance of the phylum  
523 *Verrucomicrobia*.  $p$  values were analyzed using Dunnett's multiple comparisons test  
524 (\* $p < 0.05$ , \*\* $p < 0.01$ , \*\*\* $p < 0.001$ , \*\*\*\* $p < 0.0001$ ). (d) Heatmap and bacterial taxa  
525 information (genus, family and phylum) of the Top 100 OTUs. Difference was  
526 analyzed using Paired Wilcoxon rank-sum test (\* $p < 0.05$ ).

527 **Fig.4. Effects of PBG on *A. muciniphila* growth and colonization as well as gene**

528 **expression of intestinal mucin 2.** (a) Growth of *A. muciniphila* as a single culture in  
529 the presence or absence of 10-mM PBG (with six technical replicates); (b) Growth of *A.*  
530 *muciniphila* in complex microbiota using the *in vitro* gut simulator with or without  
531 PBG exposure; (c) Effects of PBG treatment on *A. muciniphila* colonization in  
532 microbiota-depleted mice. HFD-fed mice were treated daily with a cocktail of  
533 antibiotics for one month, followed by supplementation with or without PBG (400  
534 mg/kg) for another month in the presence of antibiotics. Mice were lavaged with *A.*  
535 *muciniphila* ( $1.5 \times 10^8$  cfu) continuously for 3 days. *A. muciniphila* in the fecal  
536 samples was determined 24 h after each lavage; (d) Effects of PBG treatment on gene  
537 expression of protein and glycosyltransferases of mucin 2 in the colon tissues from



538 microbiota-depleted mice. *p* value was analyzed using unpaired two-tailed Student's  
539 t-test ( $*p < 0.05$ ).

540 **Fig.5. Obesity and related metabolic inflammation were reversed by fecal**  
541 **transplantation from PBG-treated mice to HFD-fed mice.** HFD-fed mice were  
542 colonized with feces from different mouse groups for 8 weeks (n=6-8 for each group),  
543 followed by measurement of body weight (a), total bile acid (b), serum adiponectin (c),  
544 leptin (d), IL-6 (e), IL-1 $\beta$  (f), and TNF- $\alpha$  (g). *p* value in (a) and (c) were analyzed using  
545 unpaired two-tailed Student's t-test. *p* value in (b) and (d)-(g) were analyzed using  
546 Dunnett's multiple comparisons test.  $*p < 0.05$ ,  $**p < 0.01$ ,  $***p < 0.001$ ,  $****p <$   
547  $0.0001$ .

548 **Fig.6. Transcriptome analysis of differentially expressed genes (DEGs) in colon**  
549 **tissues of microbiota-depleted mice treated with or without PBG.** HFD-fed mice  
550 were treated daily with a cocktail of antibiotics for one month, followed by  
551 supplementation with or without PBG (400 mg/kg) for another month in the presence  
552 of antibiotics. (a) heatmap of total 155 DEGs; (b) Gene Ontology (GO) assignments of  
553 DEGs; (c) KEGG enrichment analysis of PBG-induced upregulated DEGs. The top 20  
554 pathways were shown. The x-axis indicates the enrichment factor, and the y-axis shows  
555 the KEGG pathway.

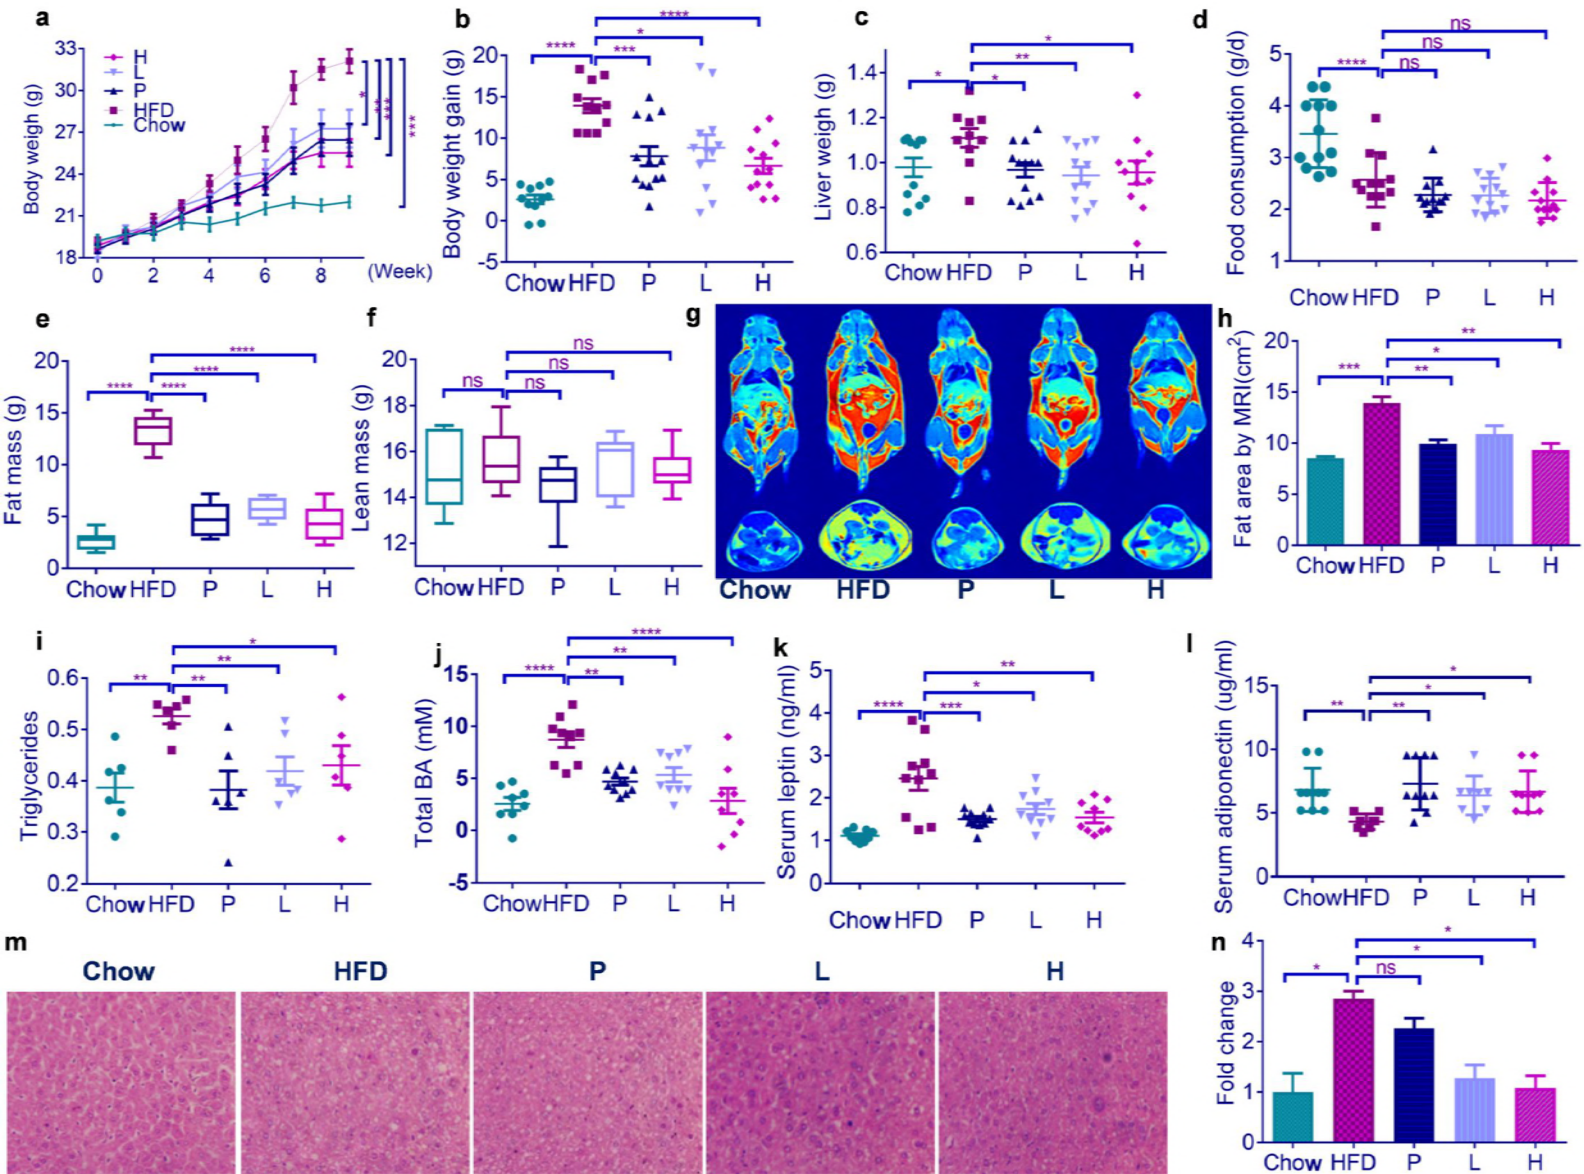

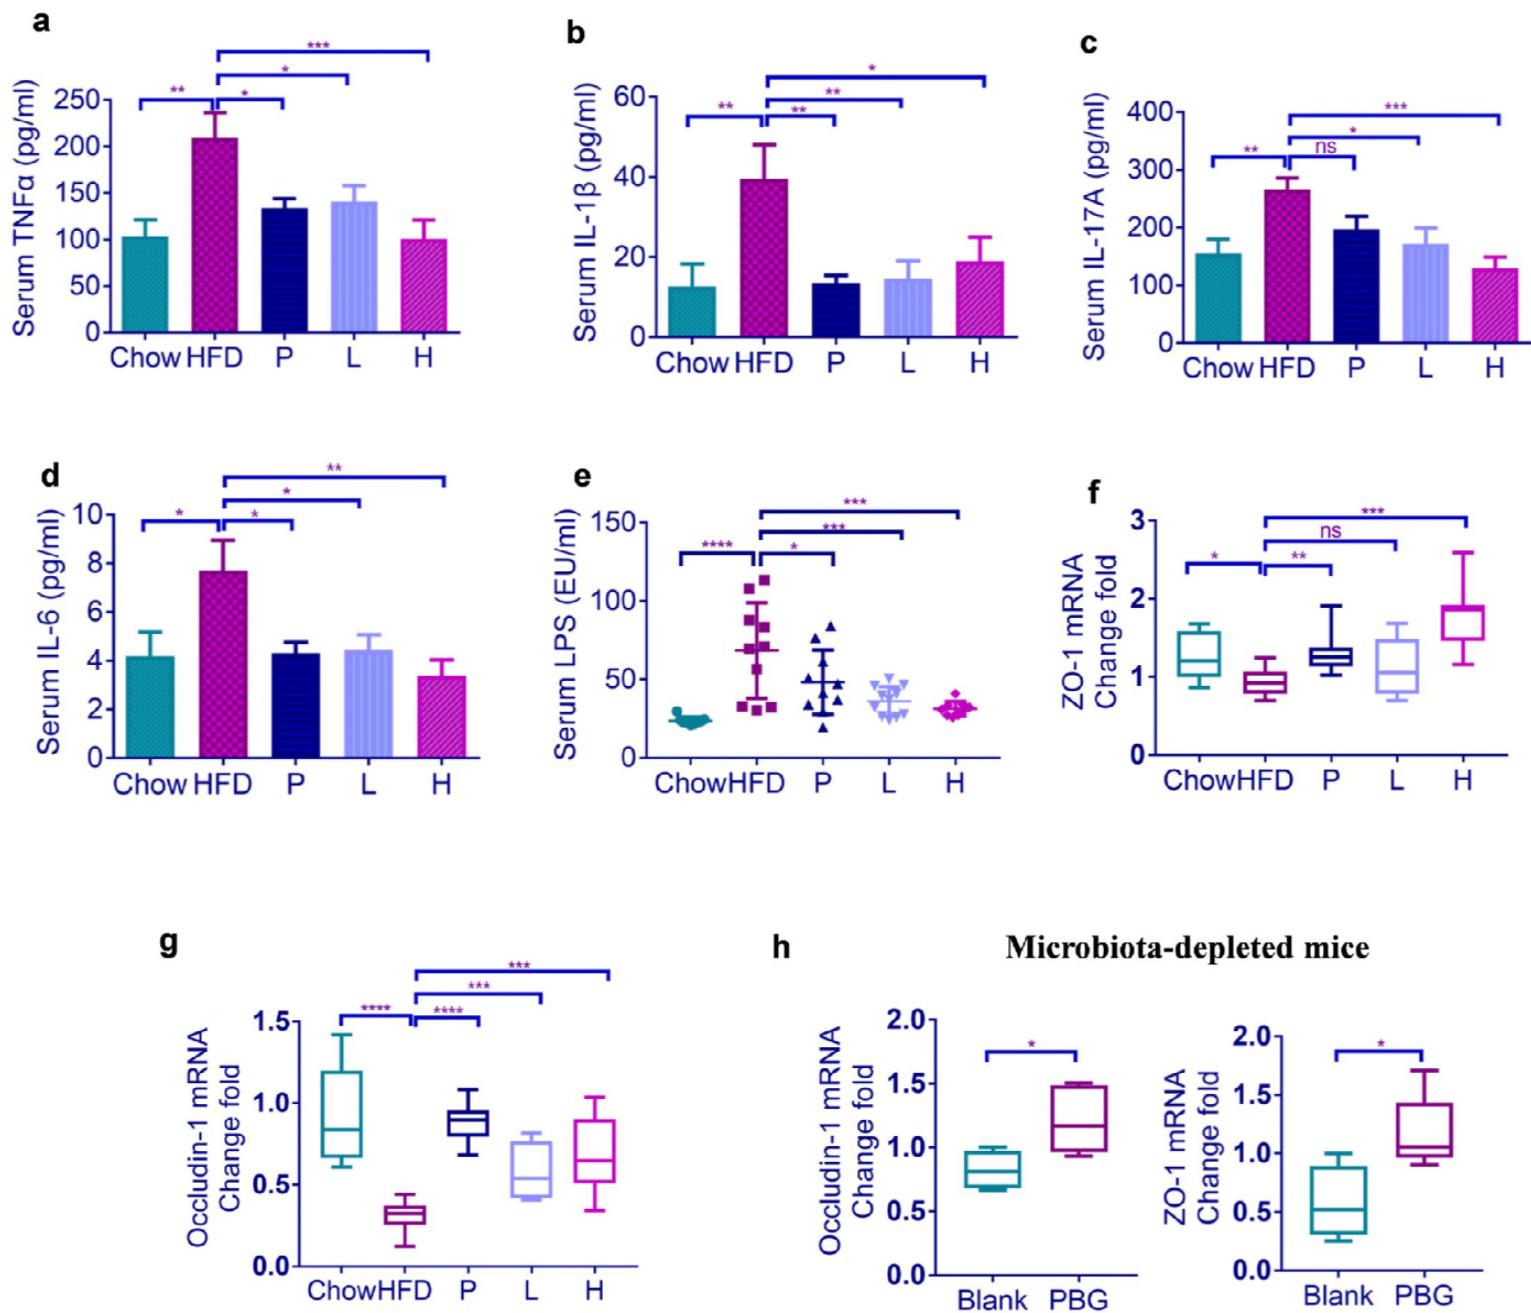

a

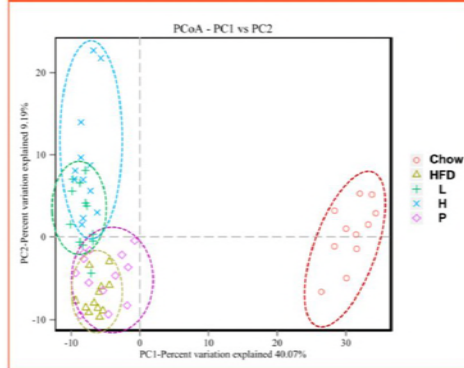

c

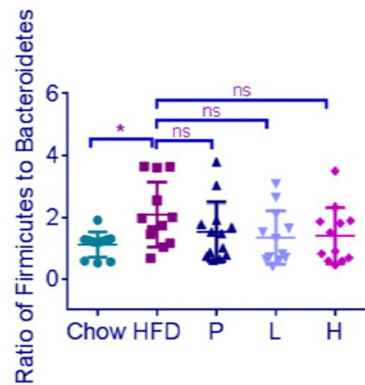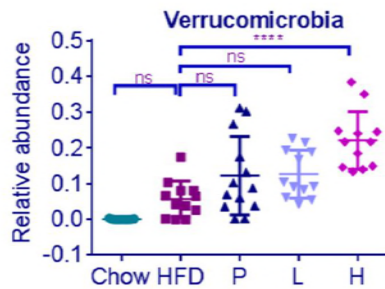

b

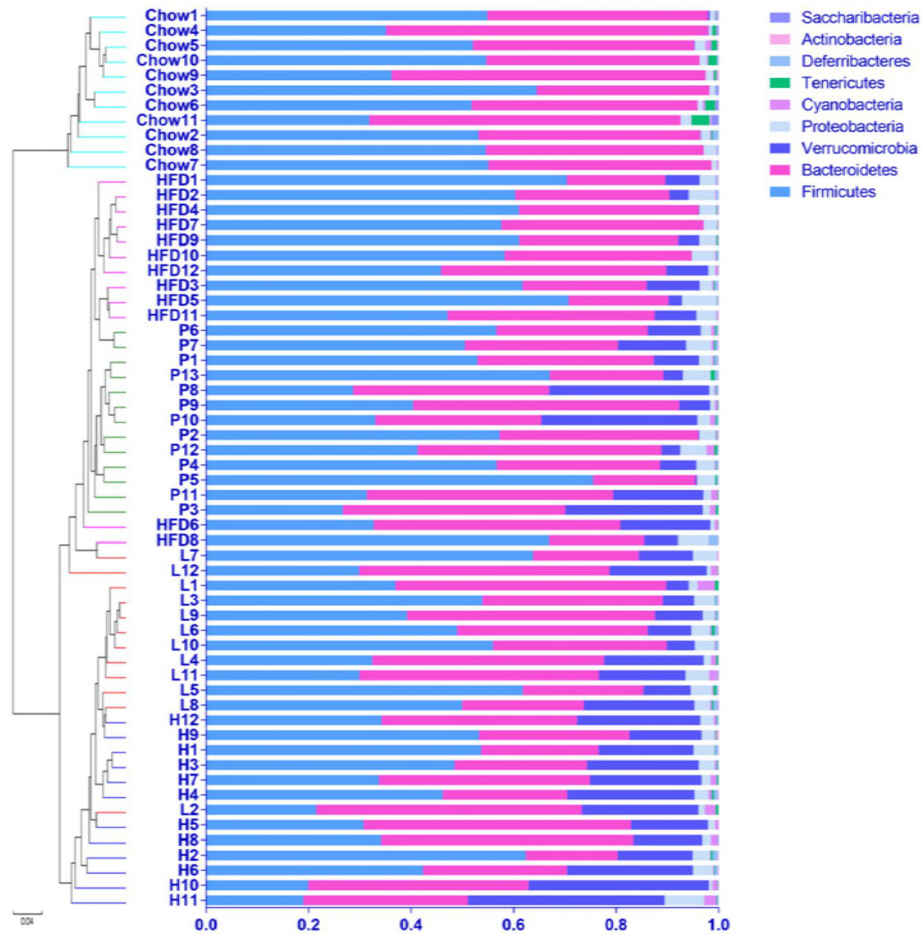



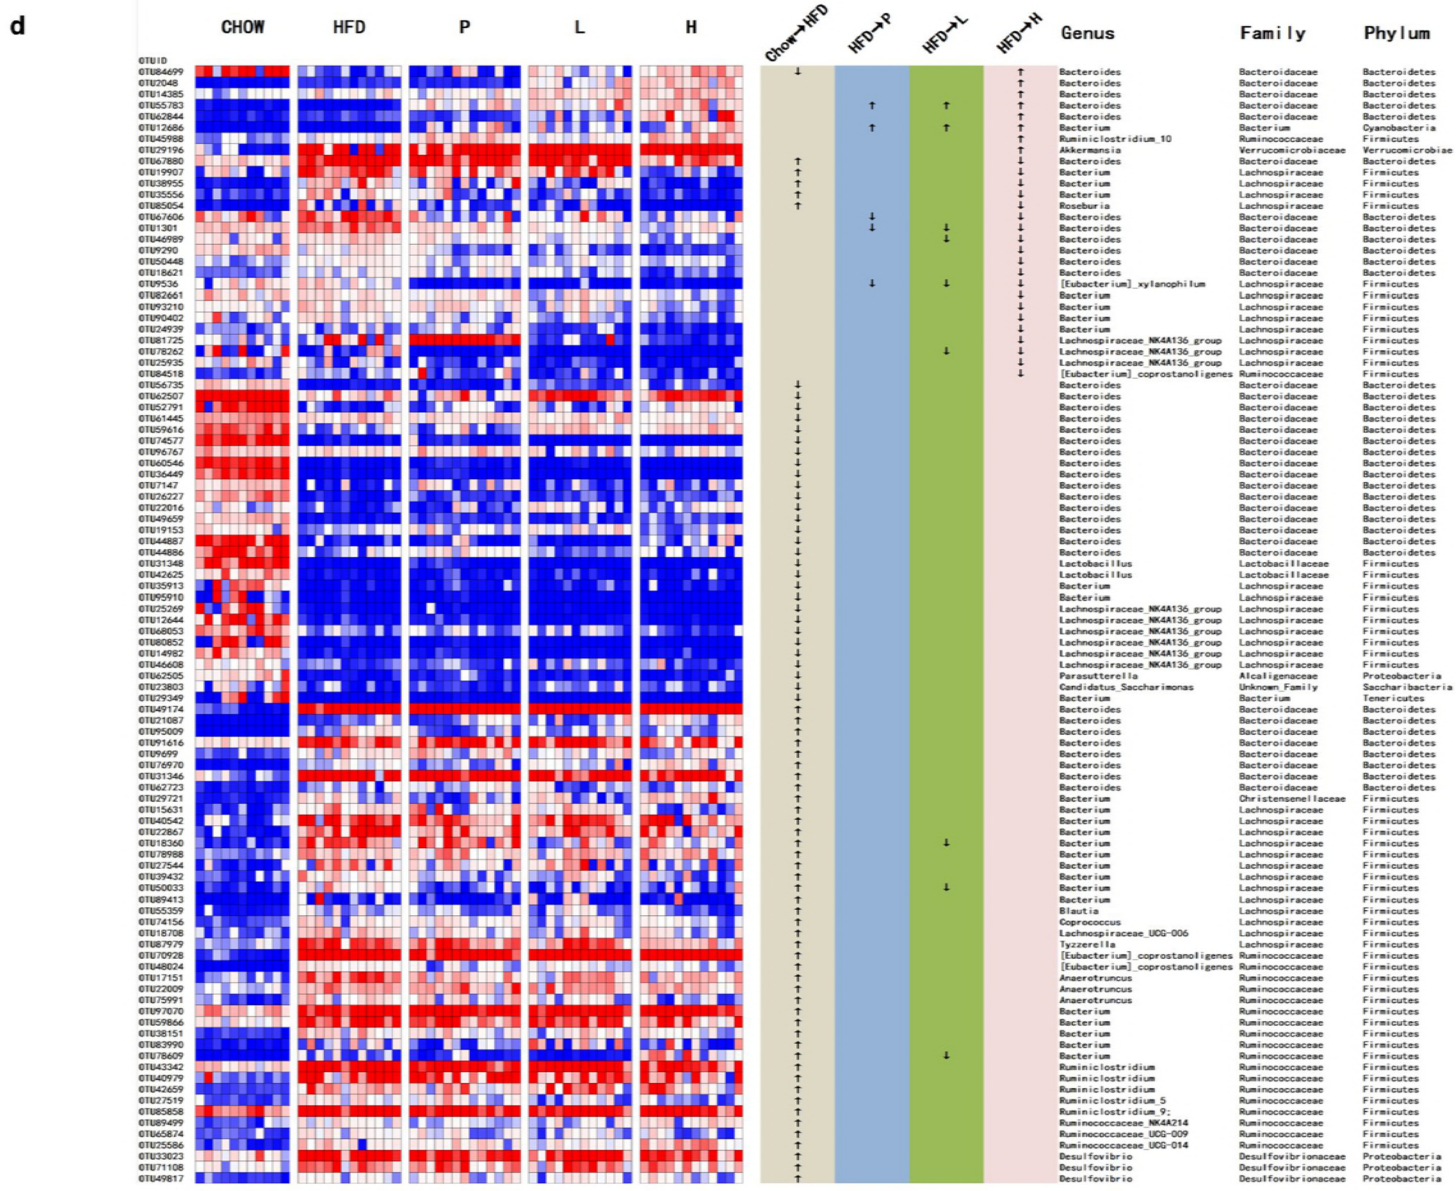

**a**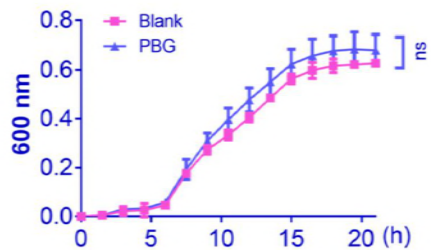**b**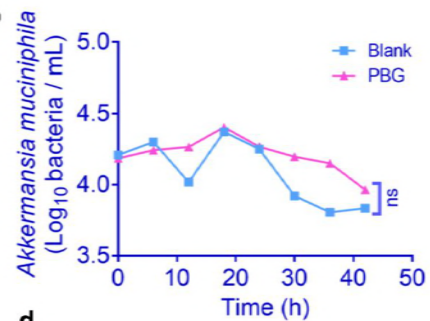**c**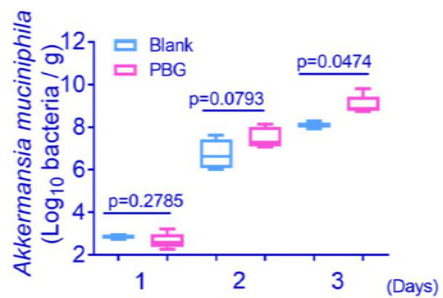**d**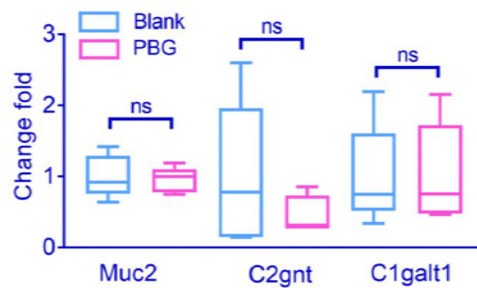

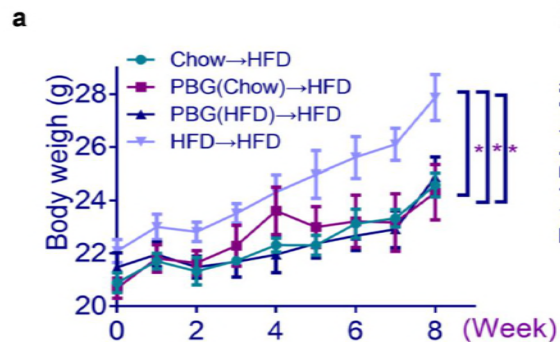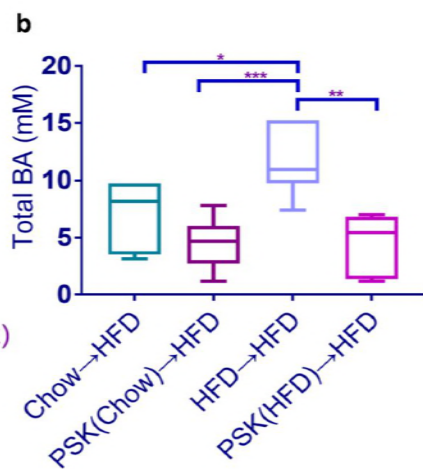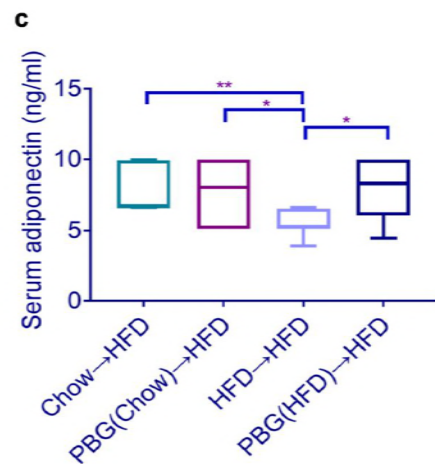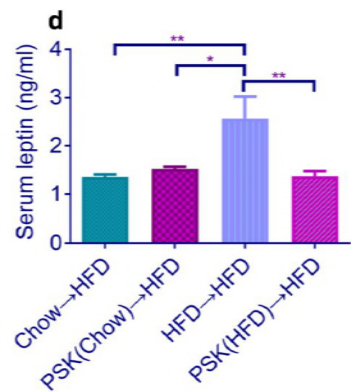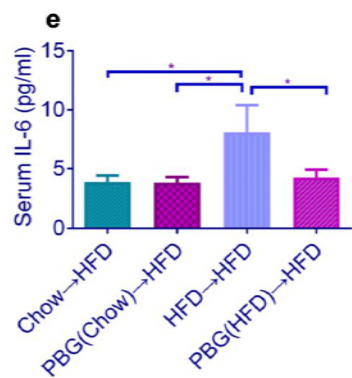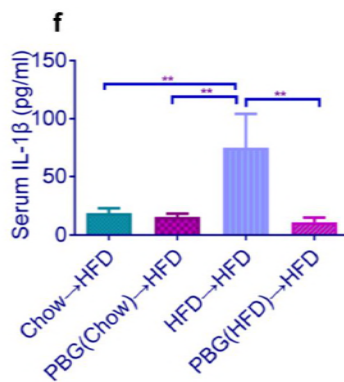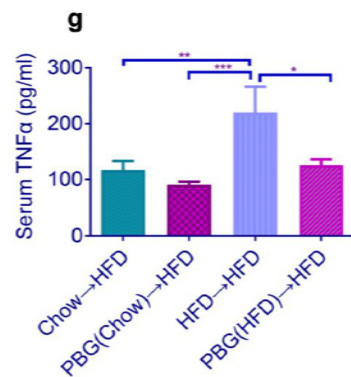

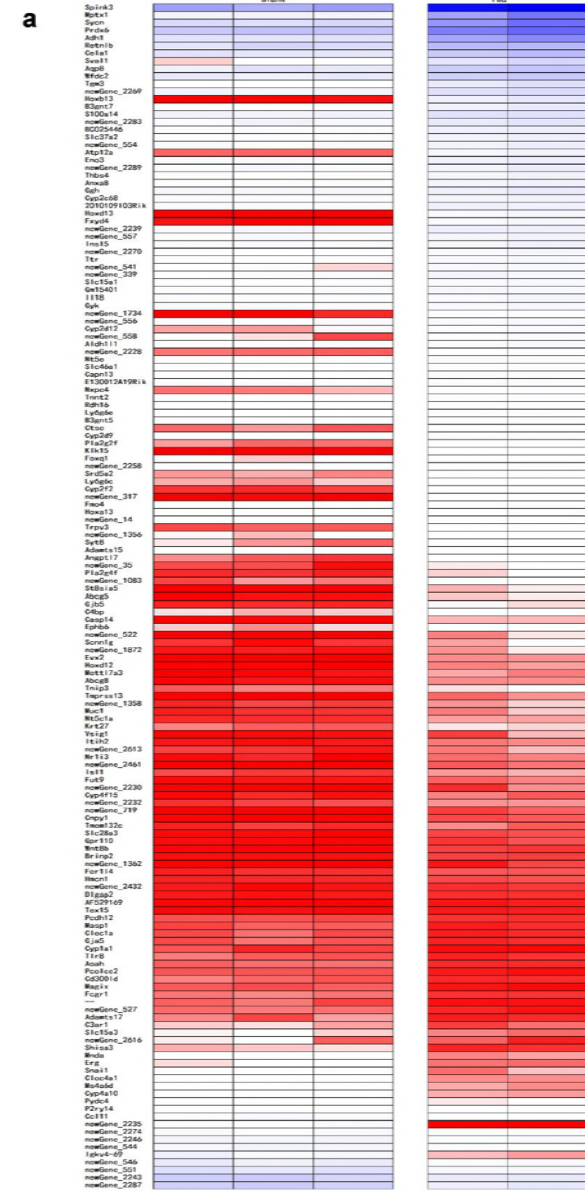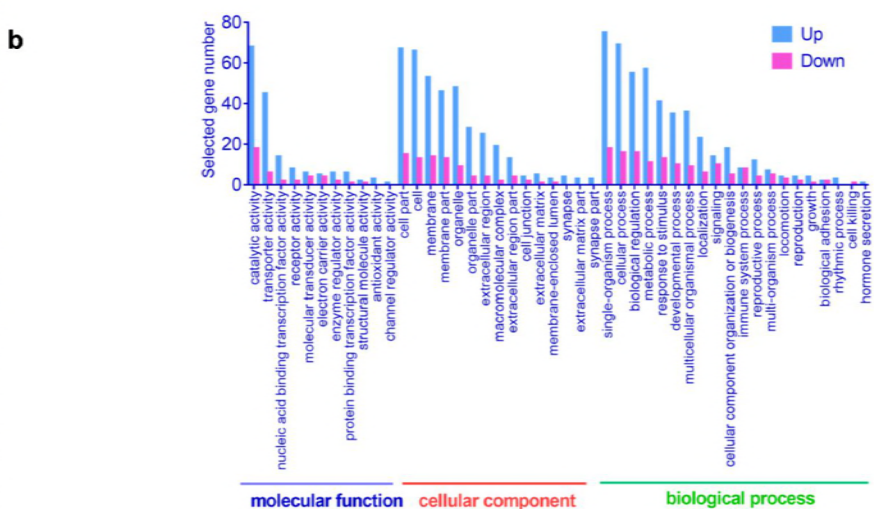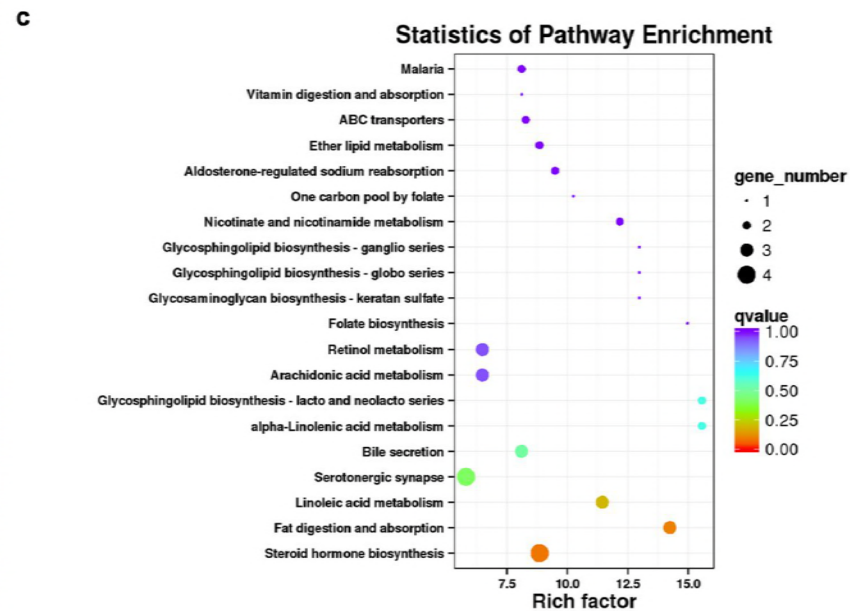

Source: https://www.biorxiv.org/content/10.1101/375584v1.full.pdf
